# Supplementary material
Source: MDPI journal article supplement (https://www.mdpi.com/2073-4336/2/3/355)
Supplement: s1 [file s1]

(* Content-type: application/vnd.wolfram.cdf.text *)

(*** Wolfram CDF File ***)
(* http://www.wolfram.com/cdf *)

(* CreatedBy='Mathematica 8.0' *)

(*************************************************************************)
(*                                                                       *)
(*  The Mathematica License under which this file was created prohibits  *)
(*  restricting third parties in receipt of this file from republishing  *)
(*  or redistributing it by any means, including but not limited to      *)
(*  rights management or terms of use, without the express consent of    *)
(*  Wolfram Research, Inc.                                               *)
(*                                                                       *)
(*************************************************************************)

(*CacheID: 234*)
(* Internal cache information:
NotebookFileLineBreakTest
NotebookFileLineBreakTest
NotebookDataPosition[       835,         17]
NotebookDataLength[     71291,       1679]
NotebookOptionsPosition[     71375,       1666]
NotebookOutlinePosition[     71795,       1682]
CellTagsIndexPosition[     71752,       1679]
WindowFrame->Normal*)

(* Beginning of Notebook Content *)
Notebook[{

Cell[CellGroupData[{
Cell["The replicator-mutator dynamics with 3 strategies", "Title",
 CellChangeTimes->{{3.517752365493416*^9, 3.5177523895997944`*^9}, {
  3.5177525177231226`*^9, 3.5177525185701714`*^9}}],

Cell[TextData[{
 "\nBy ",
 ButtonBox["Luis R. Izquierdo",
  BaseStyle->"Hyperlink",
  ButtonData->{
    URL["http://luis.izquierdo.name"], None},
  ButtonNote->"http://luis.izquierdo.name"],
 " and ",
 ButtonBox["Segismundo S. Izquierdo",
  BaseStyle->"Hyperlink",
  ButtonData->{
    URL["http://segis.name"], None},
  ButtonNote->"http://segis.name"]
}], "Subtitle",
 CellChangeTimes->{{3.5177524023105216`*^9, 3.5177524217326326`*^9}, {
  3.517752471921503*^9, 3.5177524892894964`*^9}}],

Cell[BoxData[Cell[TextData[{
  "This demonstration shows the phase portrait of the replicator-mutator \
dynamics with 3 strategies, in the 2-dimensional simplex. Parameters ",
  Cell[BoxData[
   FormBox[
    SubscriptBox["a", "ij"], TraditionalForm]], "InlineMath"],
  " \[GreaterEqual] 0 denote the payoff that an ",
  StyleBox["i",
   FontSlant->"Italic"],
  "-strategist obtains in an interaction with a ",
  StyleBox["j",
   FontSlant->"Italic"],
  "-strategist. Parameter \[Mu] denotes the total fraction of mutants or \
entrants in the population. Parameters ",
  Cell[BoxData[
   FormBox[
    SubscriptBox["m", "i"], TraditionalForm]], "InlineMath"],
  " \[GreaterEqual] 0 denote the weight given by mutants to strategy ",
  StyleBox["i",
   FontSlant->"Italic"],
  ", so ",
  Cell[BoxData[
   FormBox[
    RowBox[{"(", 
     RowBox[{
      SubscriptBox["m", "i"], "/", " ", 
      RowBox[{
       UnderoverscriptBox["\[Sum]", 
        RowBox[{"k", "=", "1"}], "3"], 
       SubscriptBox["m", "k"]}]}], ")"}], TraditionalForm]], "InlineMath"],
  " is the fraction of mutants that adopt strategy ",
  StyleBox["i",
   FontSlant->"Italic"],
  ". The program also calculates the critical points of the system, and their \
corresponding eigenvalues (which are helpful to assess the dynamic stability \
of the critical point)."
 }], "ManipulateCaption",
  CellChangeTimes->{{3.5177293167771044`*^9, 3.517729329448829*^9}, {
   3.5177298041399803`*^9, 3.517729942883916*^9}, {3.5177299794400063`*^9, 
   3.51773001376897*^9}, {3.517730075818519*^9, 3.517730094328578*^9}, {
   3.5177302522836123`*^9, 3.517730313329104*^9}, {3.517730460187504*^9, 
   3.517730529818486*^9}, {3.5177451453814487`*^9, 3.517745167202697*^9}, {
   3.517746642443076*^9, 3.517746713078116*^9}, {3.517746747979112*^9, 
   3.517746860605554*^9}, {3.5177469113844585`*^9, 
   3.517746916155731*^9}}]], "Text",
 CellChangeTimes->{{3.5177653878123274`*^9, 3.517765390591486*^9}, {
  3.517765592084011*^9, 3.5177656106060705`*^9}, {3.5178485190824604`*^9, 
  3.5178485190824604`*^9}, {3.5180038880270824`*^9, 3.5180038929253626`*^9}},
 FontWeight->"Bold",
 Background->GrayLevel[1]],

Cell[BoxData[
 TagBox[
  StyleBox[
   DynamicModuleBox[{$CellContext`a11$$ = 1, $CellContext`a12$$ = 
    1, $CellContext`a13$$ = 0.01, $CellContext`a21$$ = 1, $CellContext`a22$$ =
     1, $CellContext`a23$$ = 0.99, $CellContext`a31$$ = 
    0.01, $CellContext`a32$$ = 0.99, $CellContext`a33$$ = 
    0.4, $CellContext`m1$$ = 1, $CellContext`m2$$ = 1, $CellContext`m3$$ = 
    1, $CellContext`update$$ = 0, $CellContext`\[Mu]$$ = 0.0001, 
    Typeset`show$$ = True, Typeset`bookmarkList$$ = {
    "\"Fig. 2a\"" :> {$CellContext`a11$$ = 1, $CellContext`a12$$ = 
       1, $CellContext`a13$$ = 0.99, $CellContext`a21$$ = 
       1, $CellContext`a22$$ = 1, $CellContext`a23$$ = 
       0.01, $CellContext`a31$$ = 0.99, $CellContext`a32$$ = 
       0.01, $CellContext`a33$$ = 0.4, $CellContext`m1$$ = 
       1, $CellContext`m2$$ = 1, $CellContext`m3$$ = 1, $CellContext`update$$ = 
       100, $CellContext`\[Mu]$$ = 0.0001}, 
     "\"Fig. 2b\"" :> {$CellContext`a11$$ = 1, $CellContext`a12$$ = 
       1, $CellContext`a13$$ = 0.5, $CellContext`a21$$ = 
       1, $CellContext`a22$$ = 1, $CellContext`a23$$ = 
       0.5, $CellContext`a31$$ = 0.5, $CellContext`a32$$ = 
       0.5, $CellContext`a33$$ = 0.4, $CellContext`m1$$ = 
       1, $CellContext`m2$$ = 1, $CellContext`m3$$ = 1, $CellContext`update$$ = 
       200, $CellContext`\[Mu]$$ = 0.0001}, 
     "\"Fig. 2c\"" :> {$CellContext`a11$$ = 1, $CellContext`a12$$ = 
       1, $CellContext`a13$$ = 0.01, $CellContext`a21$$ = 
       1, $CellContext`a22$$ = 1, $CellContext`a23$$ = 
       0.99, $CellContext`a31$$ = 0.01, $CellContext`a32$$ = 
       0.99, $CellContext`a33$$ = 0.4, $CellContext`m1$$ = 
       1, $CellContext`m2$$ = 1, $CellContext`m3$$ = 1, $CellContext`update$$ = 
       300, $CellContext`\[Mu]$$ = 0.0001}}, Typeset`bookmarkMode$$ = "Menu", 
    Typeset`animator$$, Typeset`animvar$$ = 1, Typeset`name$$ = 
    "\"untitled\"", Typeset`specs$$ = {{{
       Hold[$CellContext`a11$$], 1}, 0., 10, 
      Rational[1, 100]}, {{
       Hold[$CellContext`a12$$], 1}, 0., 10, 
      Rational[1, 100]}, {{
       Hold[$CellContext`a13$$], 0.01}, 0., 10, 
      Rational[1, 100]}, {{
       Hold[$CellContext`a21$$], 1}, 0., 10, 
      Rational[1, 100]}, {{
       Hold[$CellContext`a22$$], 1}, 0., 10, 
      Rational[1, 100]}, {{
       Hold[$CellContext`a23$$], 0.99}, 0., 10, 
      Rational[1, 100]}, {{
       Hold[$CellContext`a31$$], 0.01}, 0., 10, 
      Rational[1, 100]}, {{
       Hold[$CellContext`a32$$], 0.99}, 0., 10, 
      Rational[1, 100]}, {{
       Hold[$CellContext`a33$$], 0.4}, 0., 10, 
      Rational[1, 100]}, {{
       Hold[$CellContext`update$$], 0}, 0, 100}, {{
       Hold[$CellContext`\[Mu]$$], 0.01}, 0.01, 1, 
      Rational[1, 100]}, {{
       Hold[$CellContext`m1$$], 1}, 0., 5, 
      Rational[1, 100]}, {{
       Hold[$CellContext`m2$$], 1}, 0., 5, 
      Rational[1, 100]}, {{
       Hold[$CellContext`m3$$], 1}, 0., 5, 
      Rational[1, 100]}, {{
       Hold[$CellContext`a11$$], 1}, 
      Dynamic[InputField[
        Dynamic[$CellContext`a11$$, ($CellContext`a11$$ = If[
           NumberQ[#], 
           Clip[#, {0.001, Infinity}], 0.001])& ], Number, FieldSize -> 
        3]& ]}, {{
       Hold[$CellContext`a12$$], 1}, 
      Dynamic[InputField[
        Dynamic[$CellContext`a12$$, ($CellContext`a12$$ = If[
           NumberQ[#], 
           Clip[#, {0, Infinity}], 0])& ], Number, FieldSize -> 3]& ]}, {{
       Hold[$CellContext`a13$$], 0.01}, 
      Dynamic[InputField[
        Dynamic[$CellContext`a13$$, ($CellContext`a13$$ = If[
           NumberQ[#], 
           Clip[#, {0, Infinity}], 0])& ], Number, FieldSize -> 3]& ]}, {{
       Hold[$CellContext`a21$$], 1}, 
      Dynamic[InputField[
        Dynamic[$CellContext`a21$$, ($CellContext`a21$$ = If[
           NumberQ[#], 
           Clip[#, {0, Infinity}], 0])& ], Number, FieldSize -> 3]& ]}, {{
       Hold[$CellContext`a22$$], 1}, 
      Dynamic[InputField[
        Dynamic[$CellContext`a22$$, ($CellContext`a22$$ = If[
           NumberQ[#], 
           Clip[#, {0.001, Infinity}], 0.001])& ], Number, FieldSize -> 
        3]& ]}, {{
       Hold[$CellContext`a23$$], 0.99}, 
      Dynamic[InputField[
        Dynamic[$CellContext`a23$$, ($CellContext`a23$$ = If[
           NumberQ[#], 
           Clip[#, {0, Infinity}], 0])& ], Number, FieldSize -> 3]& ]}, {{
       Hold[$CellContext`a31$$], 0.01}, 
      Dynamic[InputField[
        Dynamic[$CellContext`a31$$, ($CellContext`a31$$ = If[
           NumberQ[#], 
           Clip[#, {0, Infinity}], 0])& ], Number, FieldSize -> 3]& ]}, {{
       Hold[$CellContext`a32$$], 0.99}, 
      Dynamic[InputField[
        Dynamic[$CellContext`a32$$, ($CellContext`a32$$ = If[
           NumberQ[#], 
           Clip[#, {0, Infinity}], 0])& ], Number, FieldSize -> 3]& ]}, {{
       Hold[$CellContext`a33$$], 0.4}, 
      Dynamic[InputField[
        Dynamic[$CellContext`a33$$, ($CellContext`a33$$ = If[
           NumberQ[#], 
           Clip[#, {0.001, Infinity}], 0.001])& ], Number, FieldSize -> 
        3]& ]}, {{
       Hold[$CellContext`\[Mu]$$], 0.0001}, 
      Rational[1, 100000], 1, 0.00001}, {{
       Hold[$CellContext`m1$$], 1}, 
      Dynamic[InputField[
        Dynamic[$CellContext`m1$$, ($CellContext`m1$$ = If[
           NumberQ[#], 
           Clip[#, {0.001, Infinity}], 0.001])& ], Number, FieldSize -> 
        3]& ]}, {{
       Hold[$CellContext`m2$$], 1}, 
      Dynamic[InputField[
        Dynamic[$CellContext`m2$$, ($CellContext`m2$$ = If[
           NumberQ[#], 
           Clip[#, {0.001, Infinity}], 0.001])& ], Number, FieldSize -> 
        3]& ]}, {{
       Hold[$CellContext`m3$$], 1}, 
      Dynamic[InputField[
        Dynamic[$CellContext`m3$$, ($CellContext`m3$$ = If[
           NumberQ[#], 
           Clip[#, {0.001, Infinity}], 0.001])& ], Number, FieldSize -> 
        3]& ]}, {
      Hold[
       Row[{"", 
         Grid[{{
            Style["payoffs", Bold]}, {
            Manipulate`Place[1], 
            Manipulate`Place[2], 
            Manipulate`Place[3]}, {
            Manipulate`Place[4], 
            Manipulate`Place[5], 
            Manipulate`Place[6]}, {
            Manipulate`Place[7], 
            Manipulate`Place[8], 
            Manipulate`Place[9]}}, Alignment -> Left, Spacings -> {2, 0}], 
         Button["Update", 
          Increment[$CellContext`update$$], ImageSize -> {70, 50}], 
         Grid[{{
            Style["mutation rates", Bold], SpanFromLeft}, {"", SpanFromLeft}, {
            Manipulate`Place[10], SpanFromLeft}, {
            Manipulate`Place[11], 
            Manipulate`Place[12], 
            Manipulate`Place[13]}}, Alignment -> Left, Spacings -> {2, 0}]}, 
        Spacer[30]]], Manipulate`Dump`ThisIsNotAControl}}, Typeset`size$$ = {
    400., {208.5, 213.5}}, Typeset`update$$ = 0, Typeset`initDone$$, 
    Typeset`skipInitDone$$ = False, $CellContext`a11$9964$$ = 
    0, $CellContext`a12$9965$$ = 0, $CellContext`a13$9966$$ = 
    0, $CellContext`a21$9967$$ = 0, $CellContext`a22$9968$$ = 
    0, $CellContext`a23$9969$$ = 0, $CellContext`a31$9970$$ = 
    0, $CellContext`a32$9971$$ = 0, $CellContext`a33$9972$$ = 
    0, $CellContext`update$9973$$ = 0}, 
    DynamicBox[Manipulate`ManipulateBoxes[
     2, StandardForm, 
      "Variables" :> {$CellContext`a11$$ = 1, $CellContext`a12$$ = 
        1, $CellContext`a13$$ = 0.01, $CellContext`a21$$ = 
        1, $CellContext`a22$$ = 1, $CellContext`a23$$ = 
        0.99, $CellContext`a31$$ = 0.01, $CellContext`a32$$ = 
        0.99, $CellContext`a33$$ = 0.4, $CellContext`m1$$ = 
        1, $CellContext`m2$$ = 1, $CellContext`m3$$ = 
        1, $CellContext`update$$ = 0, $CellContext`\[Mu]$$ = 0.0001}, 
      "ControllerVariables" :> {
        Hold[$CellContext`a11$$, $CellContext`a11$9964$$, 0], 
        Hold[$CellContext`a12$$, $CellContext`a12$9965$$, 0], 
        Hold[$CellContext`a13$$, $CellContext`a13$9966$$, 0], 
        Hold[$CellContext`a21$$, $CellContext`a21$9967$$, 0], 
        Hold[$CellContext`a22$$, $CellContext`a22$9968$$, 0], 
        Hold[$CellContext`a23$$, $CellContext`a23$9969$$, 0], 
        Hold[$CellContext`a31$$, $CellContext`a31$9970$$, 0], 
        Hold[$CellContext`a32$$, $CellContext`a32$9971$$, 0], 
        Hold[$CellContext`a33$$, $CellContext`a33$9972$$, 0], 
        Hold[$CellContext`update$$, $CellContext`update$9973$$, 0]}, 
      "OtherVariables" :> {
       Typeset`show$$, Typeset`bookmarkList$$, Typeset`bookmarkMode$$, 
        Typeset`animator$$, Typeset`animvar$$, Typeset`name$$, 
        Typeset`specs$$, Typeset`size$$, Typeset`update$$, Typeset`initDone$$,
         Typeset`skipInitDone$$}, "Body" :> 
      Module[{$CellContext`initialPoints$, $CellContext`mutationMatrix$, \
$CellContext`mutantsList$ = 
         Rationalize[{$CellContext`m1$$, $CellContext`m2$$, \
$CellContext`m3$$}], $CellContext`A$ = 
         Rationalize[{{$CellContext`a11$$, $CellContext`a12$$, \
$CellContext`a13$$}, {$CellContext`a21$$, $CellContext`a22$$, \
$CellContext`a23$$}, {$CellContext`a31$$, $CellContext`a32$$, \
$CellContext`a33$$}}], $CellContext`listOfProjectedTrajectories$, \
$CellContext`listOfArrows$, $CellContext`graphWithTrajectories$, \
$CellContext`background$, $CellContext`criticalPoints$}, \
$CellContext`update$$; $CellContext`mutationMatrix$ = (1 - 
            Rationalize[$CellContext`\[Mu]$$]) 
           IdentityMatrix[3] + (Rationalize[$CellContext`\[Mu]$$]/
            Total[$CellContext`mutantsList$]) 
           Map[Table[#, {
              3}]& , $CellContext`mutantsList$]; \
$CellContext`listOfProjectedTrajectories$ = Flatten[
           Table[
            $CellContext`Simplex2DCoord[
             $CellContext`trajectory[
              N[{$CellContext`initx1, $CellContext`initx2, 
                1 - $CellContext`initx1 - $CellContext`initx2}], \
$CellContext`A$, $CellContext`mutationMatrix$, $CellContext`tMax]], \
{$CellContext`initx1, 0, 
             1 + $CellContext`step/
              2, $CellContext`step}, {$CellContext`initx2, 0, 
             1 - $CellContext`initx1, $CellContext`step}], 
           1]; $CellContext`listOfArrows$ = Flatten[
           Map[Table[{
              Arrowheads[0.03], 
              Arrow[{
                ReplaceAll[#, $CellContext`t -> $CellContext`i], 
                
                ReplaceAll[#, $CellContext`t -> $CellContext`i + 
                  0.1]}]}, {$CellContext`i, 0.2, 3, 
              2}]& , $CellContext`listOfProjectedTrajectories$], 
           1]; $CellContext`graphWithTrajectories$ = ParametricPlot[
           
           Evaluate[$CellContext`listOfProjectedTrajectories$], \
{$CellContext`t, 0, $CellContext`tMax}, PlotStyle -> 
           Black]; $CellContext`background$ = DensityPlot[
           Norm[
            $CellContext`Simplex2DCoord[
             $CellContext`expectedChange[
              $CellContext`Simplex2DInverseCoord[{$CellContext`y1, \
$CellContext`y2}], $CellContext`A$, $CellContext`mutationMatrix$]]], \
{$CellContext`y1, 0, 1}, {$CellContext`y2, 0, 3^Rational[1, 2]/2}, ImageSize -> 
           400, ColorFunction -> "Rainbow", RegionFunction -> 
           Function[{$CellContext`y1, $CellContext`y2, $CellContext`z}, 
             
             And[$CellContext`y2 < 
              3^Rational[1, 2] $CellContext`y1, $CellContext`y2 < 
              3^Rational[1, 2] (1 - $CellContext`y1)]], BoundaryStyle -> 
           Directive[Black, Thick], Frame -> False, AspectRatio -> 
           3^Rational[1, 2]/2, 
           PlotRange -> {{-0.1, 1 + 0.1}, {-0.1, 3^Rational[1, 2]/2 + 
              0.1}}]; $CellContext`criticalPoints$ = 
         Reduce[{$CellContext`expectedChange[{$CellContext`x1, \
$CellContext`x2, $CellContext`x3}, $CellContext`A$, \
$CellContext`mutationMatrix$] == 0, 0 <= $CellContext`x1 <= 1, 
            0 <= $CellContext`x2 <= 1, 0 <= $CellContext`x3 <= 
            1, $CellContext`x1 + $CellContext`x2 + $CellContext`x3 == 
            1}, {$CellContext`x1, $CellContext`x2, $CellContext`x3}, Reals, 
           Backsubstitution -> True]; Column[{
           
           Show[{$CellContext`background$, \
$CellContext`graphWithTrajectories$, 
             Graphics[$CellContext`listOfArrows$], 
             Graphics[{
               EdgeForm[Thick], Red, 
               Map[Disk[
                 $CellContext`Simplex2DCoord[#], 0.03]& , 
                
                ReplaceAll[{$CellContext`x1, $CellContext`x2, \
$CellContext`x3}, {
                  ToRules[$CellContext`criticalPoints$]}]]}], 
             Graphics[{
               Inset[
                Style[
                "\!\(\*SubscriptBox[\(x\), \(3\)]\) = 1", Large, Bold], {0.5, 
                0.9}], 
               Inset[
                Style[
                "\!\(\*SubscriptBox[\(x\), \(1\)]\) = 1", Large, Bold], {
                0, -0.05}], 
               Inset[
                Style[
                "\!\(\*SubscriptBox[\(x\), \(2\)]\) = 1", Large, Bold], {
                1, -0.05}]}]}, 
            PlotRange -> {{-0.1, 1 + 0.1}, {-0.1, 3^Rational[1, 2]/2 + 0.1}}, 
            Frame -> False, Axes -> False], 
           Column[{
             Style["Critical points", Red, Bold, 14], 
             Row[{
               TableForm[
                
                ReplaceRepeated[{$CellContext`x1, $CellContext`x2, \
$CellContext`x3}, {
                  ToRules[
                   N[$CellContext`criticalPoints$]]}], 
                TableHeadings -> {None, {
                   Style["\!\(\*SubscriptBox[\(x\), \(1\)]\)", Bold, 14], 
                   Style["\!\(\*SubscriptBox[\(x\), \(2\)]\)", Bold, 14], 
                   Style["\!\(\*SubscriptBox[\(x\), \(3\)]\)", Bold, 14]}}, 
                TableSpacing -> {2, 1}, TableAlignments -> {Left, Bottom}], 
               TableForm[
                Map[Eigenvalues[
                  $CellContext`Jacob[#, $CellContext`A$, \
$CellContext`mutationMatrix$]]& , 
                 ReplaceRepeated[{$CellContext`x1, $CellContext`x2}, {
                   ToRules[
                    N[$CellContext`criticalPoints$]]}]], 
                TableHeadings -> {None, {
                   Style[
                   "\!\(\*SubscriptBox[\(\[Lambda]\), \(1\)]\)", Bold, 14], 
                   Style[
                   "\!\(\*SubscriptBox[\(\[Lambda]\), \(2\)]\)", Bold, 14]}}, 
                TableSpacing -> {2, 1}, TableAlignments -> {Right, Bottom}]}, 
              "   "]}, Alignment -> Center, Spacings -> 1, Frame -> True]}, 
          Center]], "Specifications" :> {{{$CellContext`a11$$, 1}, 0., 10, 
         Rational[1, 100], ControlType -> None}, {{$CellContext`a12$$, 1}, 0.,
          10, 
         Rational[1, 100], ControlType -> None}, {{$CellContext`a13$$, 0.01}, 
         0., 10, 
         Rational[1, 100], ControlType -> None}, {{$CellContext`a21$$, 1}, 0.,
          10, 
         Rational[1, 100], ControlType -> None}, {{$CellContext`a22$$, 1}, 0.,
          10, 
         Rational[1, 100], ControlType -> None}, {{$CellContext`a23$$, 0.99}, 
         0., 10, 
         Rational[1, 100], ControlType -> None}, {{$CellContext`a31$$, 0.01}, 
         0., 10, 
         Rational[1, 100], ControlType -> None}, {{$CellContext`a32$$, 0.99}, 
         0., 10, 
         Rational[1, 100], ControlType -> None}, {{$CellContext`a33$$, 0.4}, 
         0., 10, 
         Rational[1, 100], ControlType -> None}, {{$CellContext`update$$, 0}, 
         0, 100, ControlType -> None}, {{$CellContext`\[Mu]$$, 0.01}, 0.01, 1, 
         Rational[1, 100], ControlType -> None}, {{$CellContext`m1$$, 1}, 0., 
         5, 
         Rational[1, 100], ControlType -> None}, {{$CellContext`m2$$, 1}, 0., 
         5, 
         Rational[1, 100], ControlType -> None}, {{$CellContext`m3$$, 1}, 0., 
         5, 
         Rational[1, 100], ControlType -> None}, {{$CellContext`a11$$, 1}, 
         Dynamic[InputField[
           Dynamic[$CellContext`a11$$, ($CellContext`a11$$ = If[
              NumberQ[#], 
              Clip[#, {0.001, Infinity}], 0.001])& ], Number, FieldSize -> 
           3]& ], ControlPlacement -> 1}, {{$CellContext`a12$$, 1}, 
         Dynamic[InputField[
           Dynamic[$CellContext`a12$$, ($CellContext`a12$$ = If[
              NumberQ[#], 
              Clip[#, {0, Infinity}], 0])& ], Number, FieldSize -> 3]& ], 
         ControlPlacement -> 2}, {{$CellContext`a13$$, 0.01}, 
         Dynamic[InputField[
           Dynamic[$CellContext`a13$$, ($CellContext`a13$$ = If[
              NumberQ[#], 
              Clip[#, {0, Infinity}], 0])& ], Number, FieldSize -> 3]& ], 
         ControlPlacement -> 3}, {{$CellContext`a21$$, 1}, 
         Dynamic[InputField[
           Dynamic[$CellContext`a21$$, ($CellContext`a21$$ = If[
              NumberQ[#], 
              Clip[#, {0, Infinity}], 0])& ], Number, FieldSize -> 3]& ], 
         ControlPlacement -> 4}, {{$CellContext`a22$$, 1}, 
         Dynamic[InputField[
           Dynamic[$CellContext`a22$$, ($CellContext`a22$$ = If[
              NumberQ[#], 
              Clip[#, {0.001, Infinity}], 0.001])& ], Number, FieldSize -> 
           3]& ], ControlPlacement -> 5}, {{$CellContext`a23$$, 0.99}, 
         Dynamic[InputField[
           Dynamic[$CellContext`a23$$, ($CellContext`a23$$ = If[
              NumberQ[#], 
              Clip[#, {0, Infinity}], 0])& ], Number, FieldSize -> 3]& ], 
         ControlPlacement -> 6}, {{$CellContext`a31$$, 0.01}, 
         Dynamic[InputField[
           Dynamic[$CellContext`a31$$, ($CellContext`a31$$ = If[
              NumberQ[#], 
              Clip[#, {0, Infinity}], 0])& ], Number, FieldSize -> 3]& ], 
         ControlPlacement -> 7}, {{$CellContext`a32$$, 0.99}, 
         Dynamic[InputField[
           Dynamic[$CellContext`a32$$, ($CellContext`a32$$ = If[
              NumberQ[#], 
              Clip[#, {0, Infinity}], 0])& ], Number, FieldSize -> 3]& ], 
         ControlPlacement -> 8}, {{$CellContext`a33$$, 0.4}, 
         Dynamic[InputField[
           Dynamic[$CellContext`a33$$, ($CellContext`a33$$ = If[
              NumberQ[#], 
              Clip[#, {0.001, Infinity}], 0.001])& ], Number, FieldSize -> 
           3]& ], ControlPlacement -> 9}, {{$CellContext`\[Mu]$$, 0.0001}, 
         Rational[1, 100000], 1, 0.00001, Appearance -> "Labeled", 
         ControlPlacement -> 10}, {{$CellContext`m1$$, 1}, 
         Dynamic[InputField[
           Dynamic[$CellContext`m1$$, ($CellContext`m1$$ = If[
              NumberQ[#], 
              Clip[#, {0.001, Infinity}], 0.001])& ], Number, FieldSize -> 
           3]& ], ControlPlacement -> 11}, {{$CellContext`m2$$, 1}, 
         Dynamic[InputField[
           Dynamic[$CellContext`m2$$, ($CellContext`m2$$ = If[
              NumberQ[#], 
              Clip[#, {0.001, Infinity}], 0.001])& ], Number, FieldSize -> 
           3]& ], ControlPlacement -> 12}, {{$CellContext`m3$$, 1}, 
         Dynamic[InputField[
           Dynamic[$CellContext`m3$$, ($CellContext`m3$$ = If[
              NumberQ[#], 
              Clip[#, {0.001, Infinity}], 0.001])& ], Number, FieldSize -> 
           3]& ], ControlPlacement -> 13}, 
        Row[{"", 
          Grid[{{
             Style["payoffs", Bold]}, {
             Manipulate`Place[1], 
             Manipulate`Place[2], 
             Manipulate`Place[3]}, {
             Manipulate`Place[4], 
             Manipulate`Place[5], 
             Manipulate`Place[6]}, {
             Manipulate`Place[7], 
             Manipulate`Place[8], 
             Manipulate`Place[9]}}, Alignment -> Left, Spacings -> {2, 0}], 
          Button["Update", 
           Increment[$CellContext`update$$], ImageSize -> {70, 50}], 
          Grid[{{
             Style["mutation rates", Bold], SpanFromLeft}, {
            "", SpanFromLeft}, {
             Manipulate`Place[10], SpanFromLeft}, {
             Manipulate`Place[11], 
             Manipulate`Place[12], 
             Manipulate`Place[13]}}, Alignment -> Left, Spacings -> {2, 0}]}, 
         Spacer[30]]}, 
      "Options" :> {
       SynchronousUpdating -> False, Alignment -> Center, 
        TrackedSymbols :> {$CellContext`\[Mu]$$, $CellContext`update$$}}, 
      "DefaultOptions" :> {}],
     ImageSizeCache->{673., {275., 280.}},
     SingleEvaluation->True],
    Deinitialization:>None,
    DynamicModuleValues:>{},
    Initialization:>({$CellContext`Simplex2DCoord[{
          Pattern[$CellContext`x1, 
           Blank[]], 
          Pattern[$CellContext`x2, 
           Blank[]], 
          Pattern[$CellContext`x3, 
           Blank[]]}] := $CellContext`x1 {0, 0} + $CellContext`x2 {1, 
          0} + $CellContext`x3 {1/2, Sqrt[3]/2}, $CellContext`trajectory[
         Pattern[$CellContext`initialPoint, 
          Blank[List]], 
         Pattern[$CellContext`A, 
          Blank[]], 
         Pattern[$CellContext`M, 
          Blank[]], 
         Pattern[$CellContext`time, 
          Blank[]]] := 
       Module[{$CellContext`expChange, $CellContext`phaseSolutions}, \
$CellContext`expChange = $CellContext`expectedChange[{
             $CellContext`x1[$CellContext`t], 
             $CellContext`x2[$CellContext`t], 
             $CellContext`x3[$CellContext`t]}, $CellContext`A, \
$CellContext`M]; $CellContext`phaseSolutions = 
          NDSolve[{
            Derivative[1][$CellContext`x1][$CellContext`t] == 
             Part[$CellContext`expChange, 1], 
             Derivative[1][$CellContext`x2][$CellContext`t] == 
             Part[$CellContext`expChange, 2], 
             Derivative[1][$CellContext`x3][$CellContext`t] == 
             Part[$CellContext`expChange, 3], $CellContext`x1[0] == 
             Part[$CellContext`initialPoint, 1], $CellContext`x2[0] == 
             Part[$CellContext`initialPoint, 2], $CellContext`x3[0] == 
             Part[$CellContext`initialPoint, 
               3]}, {$CellContext`x1, $CellContext`x2, $CellContext`x3}, \
{$CellContext`t, 0, $CellContext`time}]; Join[
           ReplaceAll[
            $CellContext`x1[$CellContext`t], $CellContext`phaseSolutions], 
           ReplaceAll[
            $CellContext`x2[$CellContext`t], $CellContext`phaseSolutions], 
           ReplaceAll[
            $CellContext`x3[$CellContext`t], $CellContext`phaseSolutions]]], \
$CellContext`expectedChange[
         Pattern[$CellContext`x, 
          Blank[]], 
         Pattern[$CellContext`A, 
          Blank[]], 
         Pattern[$CellContext`M, 
          Blank[]]] := 
       Dot[$CellContext`M, $CellContext`x 
          Dot[$CellContext`A, $CellContext`x]] - 
        Dot[$CellContext`x, $CellContext`A, $CellContext`x] $CellContext`x, 
       Attributes[Derivative] = {NHoldAll, ReadProtected}, $CellContext`tMax = 
       10, $CellContext`step = 0.1, $CellContext`Simplex2DInverseCoord[{
          Pattern[$CellContext`y1, 
           Blank[]], 
          Pattern[$CellContext`y2, 
           Blank[]]}] := {1, 0, 
         0} + $CellContext`y1 {-1, 1, 
          0} + $CellContext`y2 {(-1)/Sqrt[3], (-1)/Sqrt[3], 2/Sqrt[3]}, 
       Attributes[Thick] = {ReadProtected}, 
       Attributes[PlotRange] = {ReadProtected}, $CellContext`Jacob[{
          Pattern[$CellContext`x, 
           Blank[]], 
          Pattern[$CellContext`y, 
           Blank[]]}, 
         Pattern[$CellContext`A, 
          Blank[]], 
         Pattern[$CellContext`M, 
          Blank[]]] := Module[{$CellContext`x1, $CellContext`x2}, 
         ReplaceAll[
          Evaluate[
           D[
            Most[
             $CellContext`expectedChange[{$CellContext`x1, $CellContext`x2, 
               1 - $CellContext`x1 - $CellContext`x2}, $CellContext`A, \
$CellContext`M]], {{$CellContext`x1, $CellContext`x2}}]], {$CellContext`x1 -> \
$CellContext`x, $CellContext`x2 -> $CellContext`y}]]}; 
     Typeset`initDone$$ = True),
    SynchronousInitialization->True,
    UnsavedVariables:>{Typeset`initDone$$},
    UntrackedVariables:>{Typeset`size$$}], "Manipulate",
   Deployed->True,
   StripOnInput->False],
  Manipulate`InterpretManipulate[1]]], "Output",
 CellChangeTimes->{3.5180097834339495`*^9},
 TextAlignment->Center],

Cell[CellGroupData[{

Cell["Source code", "Section",
 CellChangeTimes->{{3.5177649723305626`*^9, 3.5177649882424726`*^9}}],

Cell[BoxData[{
 RowBox[{
  RowBox[{"Clear", "[", 
   RowBox[{"x1", ",", "x2", ",", "x3", ",", "t"}], "]"}], 
  ";"}], "\[IndentingNewLine]", 
 RowBox[{
  RowBox[{"tMax", "=", "10"}], ";"}], "\[IndentingNewLine]", 
 RowBox[{
  RowBox[{
   RowBox[{"step", "=", "0.1"}], ";"}], 
  "\[IndentingNewLine]"}], "\[IndentingNewLine]", 
 RowBox[{
  RowBox[{
   RowBox[{"Simplex2DCoord", "[", 
    RowBox[{"{", 
     RowBox[{"x1_", ",", " ", "x2_", ",", " ", "x3_"}], "}"}], "]"}], " ", ":=", 
   RowBox[{
    RowBox[{"x1", "*", 
     RowBox[{"{", 
      RowBox[{"0", ",", " ", "0"}], "}"}]}], " ", "+", " ", 
    RowBox[{"x2", "*", 
     RowBox[{"{", 
      RowBox[{"1", ",", " ", "0"}], "}"}]}], " ", "+", " ", 
    RowBox[{"x3", "*", 
     RowBox[{"{", 
      RowBox[{
       RowBox[{"1", "/", "2"}], ",", " ", 
       RowBox[{
        SqrtBox["3"], "/", "2"}]}], "}"}]}]}]}], ";"}], "\[IndentingNewLine]", 
 RowBox[{
  RowBox[{
   RowBox[{"Simplex2DInverseCoord", "[", 
    RowBox[{"{", 
     RowBox[{"y1_", ",", "y2_"}], "}"}], "]"}], ":=", 
   RowBox[{
    RowBox[{"{", 
     RowBox[{"1", ",", "0", ",", "0"}], "}"}], "+", 
    RowBox[{"y1", "*", 
     RowBox[{"{", 
      RowBox[{
       RowBox[{"-", "1"}], ",", "1", ",", "0"}], "}"}]}], "+", 
    RowBox[{"y2", "*", 
     RowBox[{"{", 
      RowBox[{
       RowBox[{
        RowBox[{"-", "1"}], "/", 
        SqrtBox["3"]}], ",", 
       RowBox[{
        RowBox[{"-", "1"}], "/", 
        SqrtBox["3"]}], ",", 
       RowBox[{"2", "/", 
        SqrtBox["3"]}]}], "}"}]}]}]}], 
  "\[IndentingNewLine]"}], "\[IndentingNewLine]", 
 RowBox[{
  RowBox[{
   RowBox[{
    RowBox[{"expectedChange", "[", 
     RowBox[{"x_", ",", "A_", ",", "M_"}], "]"}], ":=", 
    RowBox[{
     RowBox[{"M", ".", 
      RowBox[{"(", 
       RowBox[{"x", "*", 
        RowBox[{"A", ".", "x"}]}], ")"}]}], "-", 
     RowBox[{
      RowBox[{"(", 
       RowBox[{"x", ".", "A", ".", "x"}], ")"}], " ", "x"}]}]}], ";"}], 
  "\[IndentingNewLine]"}], "\[IndentingNewLine]", 
 RowBox[{
  RowBox[{
   RowBox[{
    RowBox[{"Jacob", "[", 
     RowBox[{
      RowBox[{"{", 
       RowBox[{"x_", ",", "y_"}], "}"}], ",", "A_", ",", "M_"}], "]"}], ":=", 
    RowBox[{"Module", "[", 
     RowBox[{
      RowBox[{"{", 
       RowBox[{"x1", ",", "x2"}], "}"}], ",", 
      RowBox[{
       RowBox[{"(", 
        RowBox[{"Evaluate", "[", 
         RowBox[{"D", "[", 
          RowBox[{
           RowBox[{"Most", "[", 
            RowBox[{"expectedChange", "[", 
             RowBox[{
              RowBox[{"{", 
               RowBox[{"x1", ",", "x2", ",", 
                RowBox[{"1", "-", "x1", "-", "x2"}]}], "}"}], ",", "A", ",", 
              "M"}], "]"}], "]"}], ",", 
           RowBox[{"{", 
            RowBox[{"{", 
             RowBox[{"x1", ",", "x2"}], "}"}], "}"}]}], "]"}], "]"}], ")"}], "/.", 
       RowBox[{"{", 
        RowBox[{
         RowBox[{"x1", "->", "x"}], ",", 
         RowBox[{"x2", "->", "y"}]}], "}"}]}]}], "]"}]}], ";"}], 
  "\[IndentingNewLine]"}], "\[IndentingNewLine]", 
 RowBox[{
  RowBox[{
   RowBox[{
    RowBox[{"trajectory", "[", 
     RowBox[{"initialPoint_List", ",", "A_", ",", "M_", ",", "time_"}], "]"}],
     ":=", 
    RowBox[{"Module", "[", 
     RowBox[{
      RowBox[{"{", 
       RowBox[{"expChange", ",", "phaseSolutions"}], "}"}], ",", 
      "\[IndentingNewLine]", "\[IndentingNewLine]", 
      RowBox[{
       RowBox[{"expChange", "=", 
        RowBox[{"expectedChange", "[", 
         RowBox[{
          RowBox[{"{", 
           RowBox[{
            RowBox[{"x1", "[", "t", "]"}], ",", 
            RowBox[{"x2", "[", "t", "]"}], ",", 
            RowBox[{"x3", "[", "t", "]"}]}], "}"}], ",", "A", ",", "M"}], 
         "]"}]}], ";", "\[IndentingNewLine]", "\[IndentingNewLine]", 
       RowBox[{"phaseSolutions", "=", 
        RowBox[{"NDSolve", "[", "\[IndentingNewLine]", 
         RowBox[{
          RowBox[{"{", 
           RowBox[{
            RowBox[{
             RowBox[{
              SuperscriptBox["x1", "\[Prime]",
               MultilineFunction->None], "[", "t", "]"}], "==", 
             RowBox[{"expChange", "[", 
              RowBox[{"[", "1", "]"}], "]"}]}], ",", 
            RowBox[{
             RowBox[{
              SuperscriptBox["x2", "\[Prime]",
               MultilineFunction->None], "[", "t", "]"}], "==", 
             RowBox[{"expChange", "[", 
              RowBox[{"[", "2", "]"}], "]"}]}], ",", 
            RowBox[{
             RowBox[{
              SuperscriptBox["x3", "\[Prime]",
               MultilineFunction->None], "[", "t", "]"}], "==", 
             RowBox[{"expChange", "[", 
              RowBox[{"[", "3", "]"}], "]"}]}], "\[IndentingNewLine]", ",", 
            RowBox[{
             RowBox[{"x1", "[", "0", "]"}], "==", 
             RowBox[{"initialPoint", "[", 
              RowBox[{"[", "1", "]"}], "]"}]}], ",", 
            RowBox[{
             RowBox[{"x2", "[", "0", "]"}], "==", 
             RowBox[{"initialPoint", "[", 
              RowBox[{"[", "2", "]"}], "]"}]}], ",", 
            RowBox[{
             RowBox[{"x3", "[", "0", "]"}], "==", 
             RowBox[{"initialPoint", "[", 
              RowBox[{"[", "3", "]"}], "]"}]}]}], "}"}], ",", 
          "\[IndentingNewLine]", 
          RowBox[{"{", 
           RowBox[{"x1", ",", "x2", ",", "x3"}], "}"}], ",", 
          RowBox[{"{", 
           RowBox[{"t", ",", "0", ",", "time"}], "}"}]}], "]"}]}], ";", 
       "\[IndentingNewLine]", 
       RowBox[{"Join", "[", 
        RowBox[{
         RowBox[{
          RowBox[{"x1", "[", "t", "]"}], "/.", " ", "phaseSolutions"}], ",", 
         RowBox[{
          RowBox[{"x2", "[", "t", "]"}], "/.", " ", "phaseSolutions"}], ",", 
         RowBox[{
          RowBox[{"x3", "[", "t", "]"}], "/.", " ", "phaseSolutions"}]}], 
        "]"}]}]}], "\[IndentingNewLine]", "]"}]}], ";"}], 
  "\[IndentingNewLine]"}], "\[IndentingNewLine]", 
 RowBox[{"Manipulate", "[", 
  RowBox[{
   RowBox[{"Module", "[", 
    RowBox[{
     RowBox[{"{", "\[IndentingNewLine]", 
      RowBox[{"initialPoints", ",", "mutationMatrix", ",", 
       RowBox[{"mutantsList", "=", 
        RowBox[{"Rationalize", "[", 
         RowBox[{"{", 
          RowBox[{"m1", ",", "m2", ",", "m3"}], "}"}], "]"}]}], ",", 
       "\[IndentingNewLine]", 
       RowBox[{"A", "=", 
        RowBox[{"Rationalize", "[", 
         RowBox[{"{", 
          RowBox[{
           RowBox[{"{", 
            RowBox[{"a11", ",", "a12", ",", "a13"}], "}"}], ",", 
           RowBox[{"{", 
            RowBox[{"a21", ",", "a22", ",", "a23"}], "}"}], ",", 
           RowBox[{"{", 
            RowBox[{"a31", ",", "a32", ",", "a33"}], "}"}]}], "}"}], "]"}]}], 
       ",", "listOfProjectedTrajectories", ",", "listOfArrows", ",", 
       "graphWithTrajectories", ",", "background", ",", "criticalPoints"}], 
      "\[IndentingNewLine]", "}"}], ",", "\[IndentingNewLine]", 
     "\[IndentingNewLine]", 
     RowBox[{"update", ";", "\[IndentingNewLine]", "\[IndentingNewLine]", 
      RowBox[{"mutationMatrix", "=", 
       RowBox[{
        RowBox[{
         RowBox[{"(", 
          RowBox[{"1", "-", 
           RowBox[{"Rationalize", "[", "\[Mu]", "]"}]}], ")"}], " ", 
         RowBox[{"IdentityMatrix", "[", "3", "]"}]}], "+", 
        RowBox[{
         FractionBox[
          RowBox[{"Rationalize", "[", "\[Mu]", "]"}], 
          RowBox[{"Total", "[", "mutantsList", "]"}]], 
         RowBox[{"Map", "[", 
          RowBox[{
           RowBox[{
            RowBox[{"Table", "[", 
             RowBox[{"#", ",", 
              RowBox[{"{", "3", "}"}]}], "]"}], "&"}], ",", "mutantsList"}], 
          "]"}]}]}]}], ";", "\[IndentingNewLine]", 
      RowBox[{"listOfProjectedTrajectories", "=", 
       RowBox[{"Flatten", "[", 
        RowBox[{
         RowBox[{"Table", "[", 
          RowBox[{
           RowBox[{"Simplex2DCoord", "[", 
            RowBox[{"trajectory", "[", 
             RowBox[{
              RowBox[{"N", "[", 
               RowBox[{"{", 
                RowBox[{"initx1", ",", "initx2", ",", 
                 RowBox[{"1", "-", "initx1", "-", "initx2"}]}], "}"}], "]"}], 
              ",", "A", ",", "mutationMatrix", ",", "tMax"}], "]"}], "]"}], 
           ",", 
           RowBox[{"{", 
            RowBox[{"initx1", ",", "0", ",", 
             RowBox[{"1", "+", 
              FractionBox["step", "2"]}], ",", "step"}], "}"}], ",", 
           RowBox[{"{", 
            RowBox[{"initx2", ",", "0", ",", 
             RowBox[{"1", "-", "initx1"}], ",", "step"}], "}"}]}], "]"}], ",",
          "1"}], "]"}]}], ";", "\[IndentingNewLine]", "\[IndentingNewLine]", 
      RowBox[{"listOfArrows", "=", 
       RowBox[{"Flatten", "[", 
        RowBox[{
         RowBox[{"Map", "[", 
          RowBox[{
           RowBox[{
            RowBox[{"Table", "[", 
             RowBox[{
              RowBox[{"{", 
               RowBox[{
                RowBox[{"Arrowheads", "[", "0.03", "]"}], ",", 
                RowBox[{"Arrow", "[", 
                 RowBox[{"{", 
                  RowBox[{
                   RowBox[{"#", "/.", 
                    RowBox[{"t", "->", "i"}]}], ",", 
                   RowBox[{"#", "/.", 
                    RowBox[{"t", "->", 
                    RowBox[{"(", 
                    RowBox[{"i", "+", "0.1"}], ")"}]}]}]}], "}"}], "]"}]}], 
               "}"}], ",", 
              RowBox[{"{", 
               RowBox[{"i", ",", "0.2", ",", "3", ",", "2"}], "}"}]}], "]"}], 
            "&"}], ",", "listOfProjectedTrajectories"}], "]"}], ",", "1"}], 
        "]"}]}], ";", "\[IndentingNewLine]", "\[IndentingNewLine]", 
      RowBox[{"graphWithTrajectories", "=", 
       RowBox[{"ParametricPlot", "[", 
        RowBox[{
         RowBox[{"Evaluate", "[", "listOfProjectedTrajectories", "]"}], ",", 
         RowBox[{"{", 
          RowBox[{"t", ",", "0", ",", "tMax"}], "}"}], ",", 
         RowBox[{"PlotStyle", "->", "Black"}]}], "]"}]}], ";", 
      "\[IndentingNewLine]", "\[IndentingNewLine]", 
      RowBox[{"background", "=", 
       RowBox[{"DensityPlot", "[", 
        RowBox[{
         RowBox[{"Norm", "[", 
          RowBox[{"Simplex2DCoord", "[", 
           RowBox[{"expectedChange", "[", 
            RowBox[{
             RowBox[{"Simplex2DInverseCoord", "[", 
              RowBox[{"{", 
               RowBox[{"y1", ",", "y2"}], "}"}], "]"}], ",", "A", ",", 
             "mutationMatrix"}], "]"}], "]"}], "]"}], ",", 
         RowBox[{"{", 
          RowBox[{"y1", ",", "0", ",", "1"}], "}"}], ",", 
         RowBox[{"{", 
          RowBox[{"y2", ",", "0", ",", 
           FractionBox[
            SqrtBox["3"], "2"]}], "}"}], ",", 
         RowBox[{"ImageSize", "\[Rule]", "400"}], ",", 
         RowBox[{"ColorFunction", "\[Rule]", "\"\<Rainbow\>\""}], ",", 
         RowBox[{"RegionFunction", "->", 
          RowBox[{"Function", "[", 
           RowBox[{
            RowBox[{"{", 
             RowBox[{"y1", ",", "y2", ",", "z"}], "}"}], ",", 
            RowBox[{
             RowBox[{"y2", "<", 
              RowBox[{
               SqrtBox["3"], "y1"}]}], "&&", 
             RowBox[{"y2", "<", 
              RowBox[{
               SqrtBox["3"], 
               RowBox[{"(", 
                RowBox[{"1", "-", "y1"}], ")"}]}]}]}]}], "]"}]}], ",", 
         RowBox[{"BoundaryStyle", "->", 
          RowBox[{"Directive", "[", 
           RowBox[{"Black", ",", "Thick"}], "]"}]}], ",", 
         RowBox[{"Frame", "->", "False"}], ",", 
         RowBox[{"AspectRatio", "->", 
          FractionBox[
           SqrtBox["3"], "2"]}], ",", 
         RowBox[{"PlotRange", "->", 
          RowBox[{"{", 
           RowBox[{
            RowBox[{"{", 
             RowBox[{
              RowBox[{"-", "0.1"}], ",", 
              RowBox[{"1", "+", "0.1"}]}], "}"}], ",", 
            RowBox[{"{", 
             RowBox[{
              RowBox[{"-", "0.1"}], ",", 
              RowBox[{
               FractionBox[
                SqrtBox["3"], "2"], "+", "0.1"}]}], "}"}]}], "}"}]}]}], 
        "]"}]}], ";", "\[IndentingNewLine]", "\[IndentingNewLine]", 
      RowBox[{"criticalPoints", "=", 
       RowBox[{"Reduce", "[", 
        RowBox[{
         RowBox[{"{", 
          RowBox[{
           RowBox[{
            RowBox[{"expectedChange", "[", 
             RowBox[{
              RowBox[{"{", 
               RowBox[{"x1", ",", "x2", ",", "x3"}], "}"}], ",", "A", ",", 
              "mutationMatrix"}], "]"}], "==", "0"}], ",", 
           RowBox[{"0", "<=", "x1", "<=", "1"}], ",", 
           RowBox[{"0", "<=", "x2", "<=", "1"}], ",", 
           RowBox[{"0", "<=", "x3", "<=", "1"}], ",", 
           RowBox[{
            RowBox[{"x1", "+", "x2", "+", "x3"}], "==", "1"}]}], "}"}], ",", 
         RowBox[{"{", 
          RowBox[{"x1", ",", "x2", ",", "x3"}], "}"}], ",", "Reals", ",", 
         RowBox[{"Backsubstitution", "->", "True"}]}], "]"}]}], ";", 
      "\[IndentingNewLine]", "\[IndentingNewLine]", "\[IndentingNewLine]", 
      RowBox[{"Column", "[", 
       RowBox[{
        RowBox[{"{", "\[IndentingNewLine]", 
         RowBox[{
          RowBox[{"Show", "[", 
           RowBox[{
            RowBox[{"{", 
             RowBox[{"background", ",", "graphWithTrajectories", ",", 
              RowBox[{"Graphics", "[", "listOfArrows", "]"}], ",", 
              RowBox[{"Graphics", "[", 
               RowBox[{"{", 
                RowBox[{
                 RowBox[{"EdgeForm", "[", "Thick", "]"}], ",", "Red", ",", 
                 RowBox[{
                  RowBox[{"(", 
                   RowBox[{
                    RowBox[{"Disk", "[", 
                    RowBox[{
                    RowBox[{"Simplex2DCoord", "[", "#", "]"}], ",", "0.03"}], 
                    "]"}], "&"}], ")"}], "/@", 
                  RowBox[{"(", 
                   RowBox[{
                    RowBox[{"{", 
                    RowBox[{"x1", ",", "x2", ",", "x3"}], "}"}], "/.", 
                    RowBox[{"{", 
                    RowBox[{"ToRules", "[", "criticalPoints", "]"}], "}"}]}], 
                   ")"}]}]}], "}"}], "]"}], ",", 
              RowBox[{"Graphics", "[", 
               RowBox[{"{", 
                RowBox[{
                 RowBox[{"Inset", "[", 
                  RowBox[{
                   RowBox[{"Style", "[", 
                    RowBox[{
                    "\"\<\!\(\*SubscriptBox[\(x\), \(3\)]\) = 1\>\"", ",", 
                    "Large", ",", "Bold"}], "]"}], ",", 
                   RowBox[{"{", 
                    RowBox[{"0.5", ",", "0.9"}], "}"}]}], "]"}], ",", 
                 RowBox[{"Inset", "[", 
                  RowBox[{
                   RowBox[{"Style", "[", 
                    RowBox[{
                    "\"\<\!\(\*SubscriptBox[\(x\), \(1\)]\) = 1\>\"", ",", 
                    "Large", ",", "Bold"}], "]"}], ",", 
                   RowBox[{"{", 
                    RowBox[{"0", ",", 
                    RowBox[{"-", "0.05"}]}], "}"}]}], "]"}], ",", 
                 RowBox[{"Inset", "[", 
                  RowBox[{
                   RowBox[{"Style", "[", 
                    RowBox[{
                    "\"\<\!\(\*SubscriptBox[\(x\), \(2\)]\) = 1\>\"", ",", 
                    "Large", ",", "Bold"}], "]"}], ",", 
                   RowBox[{"{", 
                    RowBox[{"1", ",", 
                    RowBox[{"-", "0.05"}]}], "}"}]}], "]"}]}], "}"}], "]"}]}],
              "}"}], ",", 
            RowBox[{"PlotRange", "->", 
             RowBox[{"{", 
              RowBox[{
               RowBox[{"{", 
                RowBox[{
                 RowBox[{"-", "0.1"}], ",", 
                 RowBox[{"1", "+", "0.1"}]}], "}"}], ",", 
               RowBox[{"{", 
                RowBox[{
                 RowBox[{"-", "0.1"}], ",", 
                 RowBox[{
                  FractionBox[
                   SqrtBox["3"], "2"], "+", "0.1"}]}], "}"}]}], "}"}]}], ",", 
            RowBox[{"Frame", "->", "False"}], ",", 
            RowBox[{"Axes", "\[Rule]", "False"}]}], "]"}], ",", 
          "\[IndentingNewLine]", 
          RowBox[{"Column", "[", 
           RowBox[{
            RowBox[{"{", "\[IndentingNewLine]", 
             RowBox[{
              RowBox[{"Style", "[", 
               RowBox[{
               "\"\<Critical points\>\"", ",", "Red", ",", "Bold", ",", 
                "14"}], "]"}], ",", "\[IndentingNewLine]", 
              RowBox[{"Row", "[", 
               RowBox[{
                RowBox[{"{", 
                 RowBox[{
                  RowBox[{"TableForm", "[", 
                   RowBox[{
                    RowBox[{
                    RowBox[{"{", 
                    RowBox[{"x1", ",", "x2", ",", "x3"}], "}"}], "//.", 
                    RowBox[{"List", "[", 
                    RowBox[{"ToRules", "[", 
                    RowBox[{"N", "[", "criticalPoints", "]"}], "]"}], "]"}]}],
                     ",", 
                    RowBox[{"TableHeadings", "->", 
                    RowBox[{"{", 
                    RowBox[{"None", ",", 
                    RowBox[{"{", 
                    RowBox[{
                    RowBox[{"Style", "[", 
                    RowBox[{
                    "\"\<\!\(\*SubscriptBox[\(x\), \(1\)]\)\>\"", ",", "Bold",
                     ",", "14"}], "]"}], ",", 
                    RowBox[{"Style", "[", 
                    RowBox[{
                    "\"\<\!\(\*SubscriptBox[\(x\), \(2\)]\)\>\"", ",", "Bold",
                     ",", "14"}], "]"}], ",", 
                    RowBox[{"Style", "[", 
                    RowBox[{
                    "\"\<\!\(\*SubscriptBox[\(x\), \(3\)]\)\>\"", ",", "Bold",
                     ",", "14"}], "]"}]}], "}"}]}], "}"}]}], ",", 
                    RowBox[{"TableSpacing", "->", 
                    RowBox[{"{", 
                    RowBox[{"2", ",", "1"}], "}"}]}], ",", 
                    RowBox[{"TableAlignments", "->", 
                    RowBox[{"{", 
                    RowBox[{"Left", ",", "Bottom"}], "}"}]}]}], "]"}], ",", 
                  "\[IndentingNewLine]", 
                  RowBox[{"TableForm", "[", 
                   RowBox[{
                    RowBox[{"Map", "[", 
                    RowBox[{
                    RowBox[{
                    RowBox[{"Eigenvalues", "[", 
                    RowBox[{"Jacob", "[", 
                    RowBox[{"#", ",", "A", ",", "mutationMatrix"}], "]"}], 
                    "]"}], "&"}], ",", 
                    RowBox[{
                    RowBox[{"{", 
                    RowBox[{"x1", ",", "x2"}], "}"}], "//.", 
                    RowBox[{"List", "[", 
                    RowBox[{"ToRules", "[", 
                    RowBox[{"N", "[", "criticalPoints", "]"}], "]"}], 
                    "]"}]}]}], "]"}], ",", 
                    RowBox[{"TableHeadings", "->", 
                    RowBox[{"{", 
                    RowBox[{"None", ",", 
                    RowBox[{"{", 
                    RowBox[{
                    RowBox[{"Style", "[", 
                    RowBox[{
                    "\"\<\!\(\*SubscriptBox[\(\[Lambda]\), \(1\)]\)\>\"", ",",
                     "Bold", ",", "14"}], "]"}], ",", 
                    RowBox[{"Style", "[", 
                    RowBox[{
                    "\"\<\!\(\*SubscriptBox[\(\[Lambda]\), \(2\)]\)\>\"", ",",
                     "Bold", ",", "14"}], "]"}]}], "}"}]}], "}"}]}], ",", 
                    RowBox[{"TableSpacing", "->", 
                    RowBox[{"{", 
                    RowBox[{"2", ",", "1"}], "}"}]}], ",", 
                    RowBox[{"TableAlignments", "->", 
                    RowBox[{"{", 
                    RowBox[{"Right", ",", "Bottom"}], "}"}]}]}], "]"}]}], 
                 "}"}], ",", "\"\<   \>\""}], "]"}]}], "}"}], ",", 
            RowBox[{"Alignment", "->", "Center"}], ",", 
            RowBox[{"Spacings", "->", "1"}], ",", 
            RowBox[{"Frame", "->", "True"}]}], "]"}]}], "\[IndentingNewLine]",
          "}"}], ",", "Center"}], "]"}]}]}], "\[IndentingNewLine]", 
    "\[IndentingNewLine]", "]"}], ",", "\[IndentingNewLine]", 
   RowBox[{"{", 
    RowBox[{
     RowBox[{"{", 
      RowBox[{"a11", ",", "1"}], "}"}], ",", "0.", ",", "10", ",", 
     RowBox[{"10", "^", 
      RowBox[{"-", "2"}]}], ",", 
     RowBox[{"ControlType", "\[Rule]", "None"}]}], "}"}], ",", 
   "\[IndentingNewLine]", 
   RowBox[{"{", 
    RowBox[{
     RowBox[{"{", 
      RowBox[{"a12", ",", "1"}], "}"}], ",", "0.", ",", "10", ",", 
     RowBox[{"10", "^", 
      RowBox[{"-", "2"}]}], ",", 
     RowBox[{"ControlType", "\[Rule]", "None"}]}], "}"}], ",", 
   "\[IndentingNewLine]", 
   RowBox[{"{", 
    RowBox[{
     RowBox[{"{", 
      RowBox[{"a13", ",", "0.01"}], "}"}], ",", "0.", ",", "10", ",", 
     RowBox[{"10", "^", 
      RowBox[{"-", "2"}]}], ",", 
     RowBox[{"ControlType", "\[Rule]", "None"}]}], "}"}], ",", 
   "\[IndentingNewLine]", 
   RowBox[{"{", 
    RowBox[{
     RowBox[{"{", 
      RowBox[{"a21", ",", "1"}], "}"}], ",", "0.", ",", "10", ",", 
     RowBox[{"10", "^", 
      RowBox[{"-", "2"}]}], ",", 
     RowBox[{"ControlType", "\[Rule]", "None"}]}], "}"}], ",", 
   "\[IndentingNewLine]", 
   RowBox[{"{", 
    RowBox[{
     RowBox[{"{", 
      RowBox[{"a22", ",", "1"}], "}"}], ",", "0.", ",", "10", ",", 
     RowBox[{"10", "^", 
      RowBox[{"-", "2"}]}], ",", 
     RowBox[{"ControlType", "\[Rule]", "None"}]}], "}"}], ",", 
   "\[IndentingNewLine]", 
   RowBox[{"{", 
    RowBox[{
     RowBox[{"{", 
      RowBox[{"a23", ",", "0.99"}], "}"}], ",", "0.", ",", "10", ",", 
     RowBox[{"10", "^", 
      RowBox[{"-", "2"}]}], ",", 
     RowBox[{"ControlType", "\[Rule]", "None"}]}], "}"}], ",", 
   "\[IndentingNewLine]", 
   RowBox[{"{", 
    RowBox[{
     RowBox[{"{", 
      RowBox[{"a31", ",", "0.01"}], "}"}], ",", "0.", ",", "10", ",", 
     RowBox[{"10", "^", 
      RowBox[{"-", "2"}]}], ",", 
     RowBox[{"ControlType", "\[Rule]", "None"}]}], "}"}], ",", 
   "\[IndentingNewLine]", 
   RowBox[{"{", 
    RowBox[{
     RowBox[{"{", 
      RowBox[{"a32", ",", "0.99"}], "}"}], ",", "0.", ",", "10", ",", 
     RowBox[{"10", "^", 
      RowBox[{"-", "2"}]}], ",", 
     RowBox[{"ControlType", "\[Rule]", "None"}]}], "}"}], ",", 
   "\[IndentingNewLine]", 
   RowBox[{"{", 
    RowBox[{
     RowBox[{"{", 
      RowBox[{"a33", ",", "0.4"}], "}"}], ",", "0.", ",", "10", ",", 
     RowBox[{"10", "^", 
      RowBox[{"-", "2"}]}], ",", 
     RowBox[{"ControlType", "\[Rule]", "None"}]}], "}"}], ",", 
   "\[IndentingNewLine]", "\[IndentingNewLine]", 
   RowBox[{"{", 
    RowBox[{
     RowBox[{"{", 
      RowBox[{"update", ",", "0"}], "}"}], ",", "0", ",", "100", ",", 
     RowBox[{"ControlType", "\[Rule]", "None"}]}], "}"}], ",", 
   "\[IndentingNewLine]", "\[IndentingNewLine]", 
   RowBox[{"{", 
    RowBox[{
     RowBox[{"{", 
      RowBox[{"\[Mu]", ",", "0.01"}], "}"}], ",", "0.01", ",", "1", ",", 
     RowBox[{"10", "^", 
      RowBox[{"-", "2"}]}], ",", 
     RowBox[{"ControlType", "\[Rule]", "None"}]}], "}"}], ",", 
   "\[IndentingNewLine]", 
   RowBox[{"{", 
    RowBox[{
     RowBox[{"{", 
      RowBox[{"m1", ",", "1"}], "}"}], ",", "0.", ",", "5", ",", 
     RowBox[{"10", "^", 
      RowBox[{"-", "2"}]}], ",", 
     RowBox[{"ControlType", "\[Rule]", "None"}]}], "}"}], ",", 
   "\[IndentingNewLine]", 
   RowBox[{"{", 
    RowBox[{
     RowBox[{"{", 
      RowBox[{"m2", ",", "1"}], "}"}], ",", "0.", ",", "5", ",", 
     RowBox[{"10", "^", 
      RowBox[{"-", "2"}]}], ",", 
     RowBox[{"ControlType", "\[Rule]", "None"}]}], "}"}], ",", 
   "\[IndentingNewLine]", 
   RowBox[{"{", 
    RowBox[{
     RowBox[{"{", 
      RowBox[{"m3", ",", "1"}], "}"}], ",", "0.", ",", "5", ",", 
     RowBox[{"10", "^", 
      RowBox[{"-", "2"}]}], ",", 
     RowBox[{"ControlType", "\[Rule]", "None"}]}], "}"}], ",", 
   "\[IndentingNewLine]", "\[IndentingNewLine]", 
   RowBox[{"Row", "[", "\[IndentingNewLine]", 
    RowBox[{
     RowBox[{"{", 
      RowBox[{"\"\<\>\"", ",", "\[IndentingNewLine]", 
       RowBox[{"Grid", "[", 
        RowBox[{
         RowBox[{"{", "\[IndentingNewLine]", 
          RowBox[{
           RowBox[{"{", 
            RowBox[{"Style", "[", 
             RowBox[{"\"\<payoffs\>\"", ",", "Bold"}], "]"}], "}"}], ",", 
           "\[IndentingNewLine]", 
           RowBox[{"{", 
            RowBox[{
             RowBox[{"Control", "[", 
              RowBox[{"{", 
               RowBox[{
                RowBox[{"{", 
                 RowBox[{"a11", ",", "1"}], "}"}], ",", 
                RowBox[{
                 RowBox[{"InputField", "[", 
                  RowBox[{
                   RowBox[{"Dynamic", "[", 
                    RowBox[{"a11", ",", 
                    RowBox[{
                    RowBox[{"(", 
                    RowBox[{"a11", "=", 
                    RowBox[{"If", "[", 
                    RowBox[{
                    RowBox[{"NumberQ", "[", "#", "]"}], ",", 
                    RowBox[{"Clip", "[", 
                    RowBox[{"#", ",", 
                    RowBox[{"{", 
                    RowBox[{"0.001", ",", "\[Infinity]"}], "}"}]}], "]"}], 
                    ",", "0.001"}], "]"}]}], ")"}], "&"}]}], "]"}], ",", 
                   "Number", ",", 
                   RowBox[{"FieldSize", "\[Rule]", "3"}]}], "]"}], "&"}]}], 
               "}"}], "]"}], " ", ",", "\[IndentingNewLine]", 
             RowBox[{"Control", "[", 
              RowBox[{"{", 
               RowBox[{
                RowBox[{"{", 
                 RowBox[{"a12", ",", "1"}], "}"}], ",", 
                RowBox[{
                 RowBox[{"InputField", "[", 
                  RowBox[{
                   RowBox[{"Dynamic", "[", 
                    RowBox[{"a12", ",", 
                    RowBox[{
                    RowBox[{"(", 
                    RowBox[{"a12", "=", 
                    RowBox[{"If", "[", 
                    RowBox[{
                    RowBox[{"NumberQ", "[", "#", "]"}], ",", 
                    RowBox[{"Clip", "[", 
                    RowBox[{"#", ",", 
                    RowBox[{"{", 
                    RowBox[{"0", ",", "\[Infinity]"}], "}"}]}], "]"}], ",", 
                    "0"}], "]"}]}], ")"}], "&"}]}], "]"}], ",", "Number", ",", 
                   RowBox[{"FieldSize", "\[Rule]", "3"}]}], "]"}], "&"}]}], 
               "}"}], "]"}], ",", "\[IndentingNewLine]", 
             RowBox[{"Control", "[", 
              RowBox[{"{", 
               RowBox[{
                RowBox[{"{", 
                 RowBox[{"a13", ",", "0.01"}], "}"}], ",", 
                RowBox[{
                 RowBox[{"InputField", "[", 
                  RowBox[{
                   RowBox[{"Dynamic", "[", 
                    RowBox[{"a13", ",", 
                    RowBox[{
                    RowBox[{"(", 
                    RowBox[{"a13", "=", 
                    RowBox[{"If", "[", 
                    RowBox[{
                    RowBox[{"NumberQ", "[", "#", "]"}], ",", 
                    RowBox[{"Clip", "[", 
                    RowBox[{"#", ",", 
                    RowBox[{"{", 
                    RowBox[{"0", ",", "\[Infinity]"}], "}"}]}], "]"}], ",", 
                    "0"}], "]"}]}], ")"}], "&"}]}], "]"}], ",", "Number", ",", 
                   RowBox[{"FieldSize", "\[Rule]", "3"}]}], "]"}], "&"}]}], 
               "}"}], "]"}]}], "}"}], ",", "\[IndentingNewLine]", 
           RowBox[{"{", 
            RowBox[{
             RowBox[{"Control", "[", 
              RowBox[{"{", 
               RowBox[{
                RowBox[{"{", 
                 RowBox[{"a21", ",", "1"}], "}"}], ",", 
                RowBox[{
                 RowBox[{"InputField", "[", 
                  RowBox[{
                   RowBox[{"Dynamic", "[", 
                    RowBox[{"a21", ",", 
                    RowBox[{
                    RowBox[{"(", 
                    RowBox[{"a21", "=", 
                    RowBox[{"If", "[", 
                    RowBox[{
                    RowBox[{"NumberQ", "[", "#", "]"}], ",", 
                    RowBox[{"Clip", "[", 
                    RowBox[{"#", ",", 
                    RowBox[{"{", 
                    RowBox[{"0", ",", "\[Infinity]"}], "}"}]}], "]"}], ",", 
                    "0"}], "]"}]}], ")"}], "&"}]}], "]"}], ",", "Number", ",", 
                   RowBox[{"FieldSize", "\[Rule]", "3"}]}], "]"}], "&"}]}], 
               "}"}], "]"}], " ", ",", "\[IndentingNewLine]", 
             RowBox[{"Control", "[", 
              RowBox[{"{", 
               RowBox[{
                RowBox[{"{", 
                 RowBox[{"a22", ",", "1"}], "}"}], ",", 
                RowBox[{
                 RowBox[{"InputField", "[", 
                  RowBox[{
                   RowBox[{"Dynamic", "[", 
                    RowBox[{"a22", ",", 
                    RowBox[{
                    RowBox[{"(", 
                    RowBox[{"a22", "=", 
                    RowBox[{"If", "[", 
                    RowBox[{
                    RowBox[{"NumberQ", "[", "#", "]"}], ",", 
                    RowBox[{"Clip", "[", 
                    RowBox[{"#", ",", 
                    RowBox[{"{", 
                    RowBox[{"0.001", ",", "\[Infinity]"}], "}"}]}], "]"}], 
                    ",", "0.001"}], "]"}]}], ")"}], "&"}]}], "]"}], ",", 
                   "Number", ",", 
                   RowBox[{"FieldSize", "\[Rule]", "3"}]}], "]"}], "&"}]}], 
               "}"}], "]"}], ",", "\[IndentingNewLine]", 
             RowBox[{"Control", "[", 
              RowBox[{"{", 
               RowBox[{
                RowBox[{"{", 
                 RowBox[{"a23", ",", "0.99"}], "}"}], ",", 
                RowBox[{
                 RowBox[{"InputField", "[", 
                  RowBox[{
                   RowBox[{"Dynamic", "[", 
                    RowBox[{"a23", ",", 
                    RowBox[{
                    RowBox[{"(", 
                    RowBox[{"a23", "=", 
                    RowBox[{"If", "[", 
                    RowBox[{
                    RowBox[{"NumberQ", "[", "#", "]"}], ",", 
                    RowBox[{"Clip", "[", 
                    RowBox[{"#", ",", 
                    RowBox[{"{", 
                    RowBox[{"0", ",", "\[Infinity]"}], "}"}]}], "]"}], ",", 
                    "0"}], "]"}]}], ")"}], "&"}]}], "]"}], ",", "Number", ",", 
                   RowBox[{"FieldSize", "\[Rule]", "3"}]}], "]"}], "&"}]}], 
               "}"}], "]"}]}], "}"}], ",", "\[IndentingNewLine]", 
           RowBox[{"{", 
            RowBox[{
             RowBox[{"Control", "[", 
              RowBox[{"{", 
               RowBox[{
                RowBox[{"{", 
                 RowBox[{"a31", ",", "0.01"}], "}"}], ",", 
                RowBox[{
                 RowBox[{"InputField", "[", 
                  RowBox[{
                   RowBox[{"Dynamic", "[", 
                    RowBox[{"a31", ",", 
                    RowBox[{
                    RowBox[{"(", 
                    RowBox[{"a31", "=", 
                    RowBox[{"If", "[", 
                    RowBox[{
                    RowBox[{"NumberQ", "[", "#", "]"}], ",", 
                    RowBox[{"Clip", "[", 
                    RowBox[{"#", ",", 
                    RowBox[{"{", 
                    RowBox[{"0", ",", "\[Infinity]"}], "}"}]}], "]"}], ",", 
                    "0"}], "]"}]}], ")"}], "&"}]}], "]"}], ",", "Number", ",", 
                   RowBox[{"FieldSize", "\[Rule]", "3"}]}], "]"}], "&"}]}], 
               "}"}], "]"}], " ", ",", "\[IndentingNewLine]", 
             RowBox[{"Control", "[", 
              RowBox[{"{", 
               RowBox[{
                RowBox[{"{", 
                 RowBox[{"a32", ",", "0.99"}], "}"}], ",", 
                RowBox[{
                 RowBox[{"InputField", "[", 
                  RowBox[{
                   RowBox[{"Dynamic", "[", 
                    RowBox[{"a32", ",", 
                    RowBox[{
                    RowBox[{"(", 
                    RowBox[{"a32", "=", 
                    RowBox[{"If", "[", 
                    RowBox[{
                    RowBox[{"NumberQ", "[", "#", "]"}], ",", 
                    RowBox[{"Clip", "[", 
                    RowBox[{"#", ",", 
                    RowBox[{"{", 
                    RowBox[{"0", ",", "\[Infinity]"}], "}"}]}], "]"}], ",", 
                    "0"}], "]"}]}], ")"}], "&"}]}], "]"}], ",", "Number", ",", 
                   RowBox[{"FieldSize", "\[Rule]", "3"}]}], "]"}], "&"}]}], 
               "}"}], "]"}], ",", "\[IndentingNewLine]", 
             RowBox[{"Control", "[", 
              RowBox[{"{", 
               RowBox[{
                RowBox[{"{", 
                 RowBox[{"a33", ",", "0.4"}], "}"}], ",", 
                RowBox[{
                 RowBox[{"InputField", "[", 
                  RowBox[{
                   RowBox[{"Dynamic", "[", 
                    RowBox[{"a33", ",", 
                    RowBox[{
                    RowBox[{"(", 
                    RowBox[{"a33", "=", 
                    RowBox[{"If", "[", 
                    RowBox[{
                    RowBox[{"NumberQ", "[", "#", "]"}], ",", 
                    RowBox[{"Clip", "[", 
                    RowBox[{"#", ",", 
                    RowBox[{"{", 
                    RowBox[{"0.001", ",", "\[Infinity]"}], "}"}]}], "]"}], 
                    ",", "0.001"}], "]"}]}], ")"}], "&"}]}], "]"}], ",", 
                   "Number", ",", 
                   RowBox[{"FieldSize", "\[Rule]", "3"}]}], "]"}], "&"}]}], 
               "}"}], "]"}]}], "}"}]}], "\[IndentingNewLine]", "}"}], ",", 
         RowBox[{"Alignment", "\[Rule]", "Left"}], ",", 
         RowBox[{"Spacings", "\[Rule]", 
          RowBox[{"{", 
           RowBox[{"2", ",", "0"}], "}"}]}]}], "]"}], " ", ",", 
       "\[IndentingNewLine]", "\[IndentingNewLine]", 
       RowBox[{"Button", "[", 
        RowBox[{"\"\<Update\>\"", ",", 
         RowBox[{"update", "++"}], ",", 
         RowBox[{"ImageSize", "\[Rule]", 
          RowBox[{"{", 
           RowBox[{"70", ",", "50"}], "}"}]}]}], "]"}], ",", 
       "\[IndentingNewLine]", "\[IndentingNewLine]", 
       RowBox[{"Grid", "[", 
        RowBox[{
         RowBox[{"{", "\[IndentingNewLine]", 
          RowBox[{
           RowBox[{"{", 
            RowBox[{
             RowBox[{"Style", "[", 
              RowBox[{"\"\<mutation rates\>\"", ",", "Bold"}], "]"}], ",", 
             "SpanFromLeft"}], "}"}], ",", 
           RowBox[{"{", 
            RowBox[{"\"\<\>\"", ",", "SpanFromLeft"}], "}"}], ",", 
           "\[IndentingNewLine]", 
           RowBox[{"{", 
            RowBox[{
             RowBox[{"Control", "[", 
              RowBox[{"{", 
               RowBox[{
                RowBox[{"{", 
                 RowBox[{"\[Mu]", ",", 
                  RowBox[{"10.", "^", 
                   RowBox[{"-", "4"}]}]}], "}"}], ",", 
                RowBox[{"10", "^", 
                 RowBox[{"-", "5"}]}], ",", "1", ",", 
                RowBox[{"10.", "^", 
                 RowBox[{"-", "5"}]}], ",", 
                RowBox[{"Appearance", "\[Rule]", "\"\<Labeled\>\""}]}], " ", 
               "}"}], "]"}], ",", "SpanFromLeft"}], "}"}], ",", 
           "\[IndentingNewLine]", 
           RowBox[{"{", 
            RowBox[{
             RowBox[{"Control", "[", 
              RowBox[{"{", 
               RowBox[{
                RowBox[{"{", 
                 RowBox[{"m1", ",", "1"}], "}"}], ",", 
                RowBox[{
                 RowBox[{"InputField", "[", 
                  RowBox[{
                   RowBox[{"Dynamic", "[", 
                    RowBox[{"m1", ",", 
                    RowBox[{
                    RowBox[{"(", 
                    RowBox[{"m1", "=", 
                    RowBox[{"If", "[", 
                    RowBox[{
                    RowBox[{"NumberQ", "[", "#", "]"}], ",", 
                    RowBox[{"Clip", "[", 
                    RowBox[{"#", ",", 
                    RowBox[{"{", 
                    RowBox[{"0.001", ",", "\[Infinity]"}], "}"}]}], "]"}], 
                    ",", "0.001"}], "]"}]}], ")"}], "&"}]}], "]"}], ",", 
                   "Number", ",", 
                   RowBox[{"FieldSize", "\[Rule]", "3"}]}], "]"}], "&"}]}], 
               "}"}], "]"}], " ", ",", "\[IndentingNewLine]", 
             RowBox[{"Control", "[", 
              RowBox[{"{", 
               RowBox[{
                RowBox[{"{", 
                 RowBox[{"m2", ",", "1"}], "}"}], ",", 
                RowBox[{
                 RowBox[{"InputField", "[", 
                  RowBox[{
                   RowBox[{"Dynamic", "[", 
                    RowBox[{"m2", ",", 
                    RowBox[{
                    RowBox[{"(", 
                    RowBox[{"m2", "=", 
                    RowBox[{"If", "[", 
                    RowBox[{
                    RowBox[{"NumberQ", "[", "#", "]"}], ",", 
                    RowBox[{"Clip", "[", 
                    RowBox[{"#", ",", 
                    RowBox[{"{", 
                    RowBox[{"0.001", ",", "\[Infinity]"}], "}"}]}], "]"}], 
                    ",", "0.001"}], "]"}]}], ")"}], "&"}]}], "]"}], ",", 
                   "Number", ",", 
                   RowBox[{"FieldSize", "\[Rule]", "3"}]}], "]"}], "&"}]}], 
               "}"}], "]"}], ",", "\[IndentingNewLine]", 
             RowBox[{"Control", "[", 
              RowBox[{"{", 
               RowBox[{
                RowBox[{"{", 
                 RowBox[{"m3", ",", "1"}], "}"}], ",", 
                RowBox[{
                 RowBox[{"InputField", "[", 
                  RowBox[{
                   RowBox[{"Dynamic", "[", 
                    RowBox[{"m3", ",", 
                    RowBox[{
                    RowBox[{"(", 
                    RowBox[{"m3", "=", 
                    RowBox[{"If", "[", 
                    RowBox[{
                    RowBox[{"NumberQ", "[", "#", "]"}], ",", 
                    RowBox[{"Clip", "[", 
                    RowBox[{"#", ",", 
                    RowBox[{"{", 
                    RowBox[{"0.001", ",", "\[Infinity]"}], "}"}]}], "]"}], 
                    ",", "0.001"}], "]"}]}], ")"}], "&"}]}], "]"}], ",", 
                   "Number", ",", 
                   RowBox[{"FieldSize", "\[Rule]", "3"}]}], "]"}], "&"}]}], 
               "}"}], "]"}]}], "}"}]}], "}"}], "\[IndentingNewLine]", ",", 
         RowBox[{"Alignment", "\[Rule]", "Left"}], ",", 
         RowBox[{"Spacings", "\[Rule]", 
          RowBox[{"{", 
           RowBox[{"2", ",", "0"}], "}"}]}]}], "]"}]}], "\[IndentingNewLine]",
       "}"}], ",", 
     RowBox[{"Spacer", "[", "30", "]"}]}], "]"}], ",", "\[IndentingNewLine]", 
   "\[IndentingNewLine]", 
   RowBox[{"SaveDefinitions", "->", "True"}], ",", 
   RowBox[{"SynchronousUpdating", "->", "False"}], ",", 
   RowBox[{"Alignment", "\[Rule]", "Center"}], " ", ",", 
   RowBox[{"TrackedSymbols", "\[RuleDelayed]", 
    RowBox[{"{", 
     RowBox[{"\[Mu]", ",", "update"}], "}"}]}], ",", 
   RowBox[{"Bookmarks", "\[Rule]", 
    RowBox[{"{", 
     RowBox[{
      RowBox[{"\"\<Fig. 2a\>\"", "\[RuleDelayed]", 
       RowBox[{"{", 
        RowBox[{
         RowBox[{"a11", "=", "1"}], ",", 
         RowBox[{"a12", "=", "1"}], ",", 
         RowBox[{"a13", "=", "0.99`"}], ",", 
         RowBox[{"a21", "=", "1"}], ",", 
         RowBox[{"a22", "=", "1"}], ",", 
         RowBox[{"a23", "=", "0.01`"}], ",", 
         RowBox[{"a31", "=", "0.99`"}], ",", 
         RowBox[{"a32", "=", "0.01`"}], ",", 
         RowBox[{"a33", "=", "0.4`"}], ",", 
         RowBox[{"m1", "=", "1"}], ",", 
         RowBox[{"m2", "=", "1"}], ",", 
         RowBox[{"m3", "=", "1"}], ",", 
         RowBox[{"update", "=", "100"}], ",", 
         RowBox[{"\[Mu]", "=", "0.0001`"}]}], "}"}]}], ",", 
      RowBox[{"\"\<Fig. 2b\>\"", "\[RuleDelayed]", 
       RowBox[{"{", 
        RowBox[{
         RowBox[{"a11", "=", "1"}], ",", 
         RowBox[{"a12", "=", "1"}], ",", 
         RowBox[{"a13", "=", "0.5`"}], ",", 
         RowBox[{"a21", "=", "1"}], ",", 
         RowBox[{"a22", "=", "1"}], ",", 
         RowBox[{"a23", "=", "0.5`"}], ",", 
         RowBox[{"a31", "=", "0.5`"}], ",", 
         RowBox[{"a32", "=", "0.5`"}], ",", 
         RowBox[{"a33", "=", "0.4`"}], ",", 
         RowBox[{"m1", "=", "1"}], ",", 
         RowBox[{"m2", "=", "1"}], ",", 
         RowBox[{"m3", "=", "1"}], ",", 
         RowBox[{"update", "=", "200"}], ",", 
         RowBox[{"\[Mu]", "=", "0.0001`"}]}], "}"}]}], ",", 
      RowBox[{"\"\<Fig. 2c\>\"", "\[RuleDelayed]", 
       RowBox[{"{", 
        RowBox[{
         RowBox[{"a11", "=", "1"}], ",", 
         RowBox[{"a12", "=", "1"}], ",", 
         RowBox[{"a13", "=", "0.01`"}], ",", 
         RowBox[{"a21", "=", "1"}], ",", 
         RowBox[{"a22", "=", "1"}], ",", 
         RowBox[{"a23", "=", "0.99`"}], ",", 
         RowBox[{"a31", "=", "0.01`"}], ",", 
         RowBox[{"a32", "=", "0.99`"}], ",", 
         RowBox[{"a33", "=", "0.4`"}], ",", 
         RowBox[{"m1", "=", "1"}], ",", 
         RowBox[{"m2", "=", "1"}], ",", 
         RowBox[{"m3", "=", "1"}], ",", 
         RowBox[{"update", "=", "300"}], ",", 
         RowBox[{"\[Mu]", "=", "0.0001`"}]}], "}"}]}]}], "}"}]}]}], 
  "\[IndentingNewLine]", "]"}]}], "Input",
 CellChangeTimes->{{3.5177649899175687`*^9, 3.517765016881111*^9}, 
   3.517765433882962*^9, {3.5177720989091797`*^9, 3.517772112819976*^9}, {
   3.5178485337152863`*^9, 3.517848546164108*^9}, {3.5178485852109766`*^9, 
   3.5178486252562466`*^9}, {3.517848726484824*^9, 3.5178487709293027`*^9}, {
   3.51784890020673*^9, 3.5178489085059443`*^9}, {3.5178499729001684`*^9, 
   3.5178499732421875`*^9}, {3.517850019397828*^9, 3.517850033934659*^9}, 
   3.5178500824734354`*^9, {3.5178509247266097`*^9, 3.5178509249976254`*^9}, 
   3.5178509585525446`*^9, {3.5178510009769707`*^9, 3.5178510261614113`*^9}, {
   3.517851102121756*^9, 3.5178511113922863`*^9}, {3.517851156605872*^9, 
   3.517851172671791*^9}, {3.517851241548731*^9, 3.5178512418757496`*^9}, {
   3.5178512834041247`*^9, 3.5178513443266096`*^9}, {3.5178514223770733`*^9, 
   3.5178514451223745`*^9}, {3.517851477661236*^9, 3.517851481707467*^9}, {
   3.5178515239788847`*^9, 3.51785153280939*^9}, 3.517851657135501*^9, {
   3.5178516930705566`*^9, 3.5178517123246574`*^9}, {3.5178528684407835`*^9, 
   3.517852887310863*^9}, {3.517852928634227*^9, 3.5178529416209693`*^9}, {
   3.5178530226916065`*^9, 3.517853041617689*^9}, {3.5178530774147367`*^9, 
   3.517853106534402*^9}, {3.517853207231161*^9, 3.5178532648124547`*^9}, {
   3.5178533490792747`*^9, 3.5178533546385927`*^9}, {3.5179103874541416`*^9, 
   3.5179103877121563`*^9}, {3.517989390832556*^9, 3.5179894225562115`*^9}, {
   3.517989505645975*^9, 3.5179895211056023`*^9}, {3.517989583614912*^9, 
   3.517989651677831*^9}, {3.5179896933455043`*^9, 3.517989694827507*^9}, {
   3.5179897509564056`*^9, 3.5179897527192087`*^9}, {3.517989789628874*^9, 
   3.517989795588084*^9}, {3.517989847567375*^9, 3.517989862262601*^9}, {
   3.517989927111915*^9, 3.517989934818329*^9}, {3.5180036059719496`*^9, 
   3.518003690168765*^9}, {3.5180089598038397`*^9, 3.518008972075542*^9}, {
   3.518009569746727*^9, 3.518009658588808*^9}, {3.5180097680550694`*^9, 
   3.5180097798207426`*^9}}]
}, Closed]]
}, Open  ]]
},
WindowSize->{881, 784},
WindowMargins->{{0, Automatic}, {Automatic, 0}},
FrontEndVersion->"8.0 for Microsoft Windows (64-bit) (February 23, 2011)",
StyleDefinitions->FrontEnd`FileName[{"Creative"}, "NaturalColor.nb", 
  CharacterEncoding -> "WindowsANSI"]
]
(* End of Notebook Content *)

(* Internal cache information *)
(*CellTagsOutline
CellTagsIndex->{}
*)
(*CellTagsIndex
CellTagsIndex->{}
*)
(*NotebookFileOutline
Notebook[{
Cell[CellGroupData[{
Cell[1257, 32, 187, 2, 65, "Title"],
Cell[1447, 36, 489, 15, 40, "Subtitle"],
Cell[1939, 53, 2155, 49, 149, "Text"],
Cell[4097, 104, 23996, 503, 582, "Output"],
Cell[CellGroupData[{
Cell[28118, 611, 100, 1, 75, "Section"],
Cell[28221, 614, 43126, 1048, 3093, "Input"]
}, Closed]]
}, Open  ]]
}
]
*)

(* End of internal cache information *)

(* NotebookSignature oxTdcs70QWkdcC1bcYfAtknA *)
